# Supplementary material for: Integration of plasma and CSF metabolomics with CSF proteomic reveals novel associations between lipid mediators and central nervous system vascular and energy metabolism
Source: PubMed Central journal article supplement (PMC10447532; doi:10.1038/s41598-023-39737-8), 2023-08-23

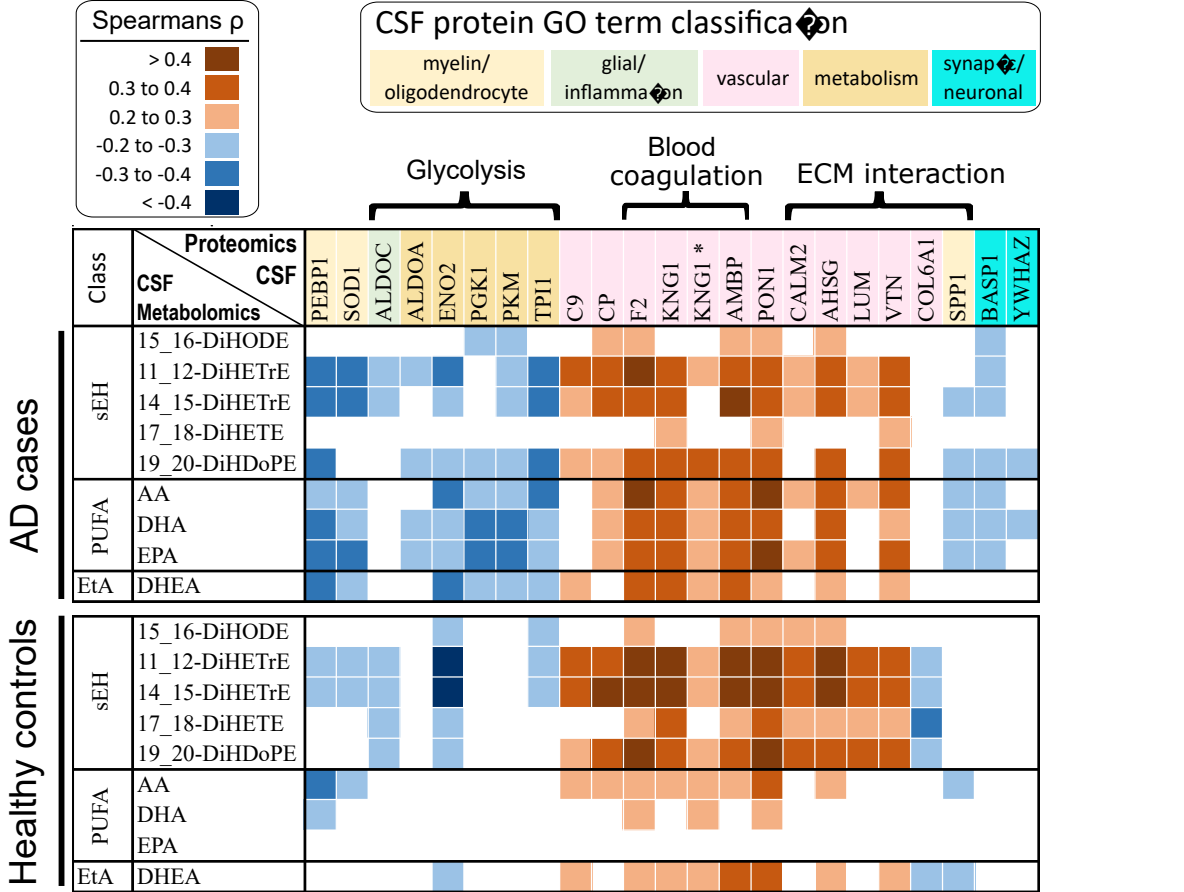

Supplement: 41598_2023_39737_MOESM2_ESM.pdf [file 41598_2023_39737_MOESM2_ESM.pdf]
