# Supplementary material for: Integration of plasma and CSF metabolomics with CSF proteomic reveals novel associations between lipid mediators and central nervous system vascular and energy metabolism
Source: PubMed Central journal article supplement (PMC10447532; doi:10.1038/s41598-023-39737-8), 2023-08-23
Supplement: 41598_2023_39737_MOESM4_ESM.pdf [file 41598_2023_39737_MOESM4_ESM.pdf]

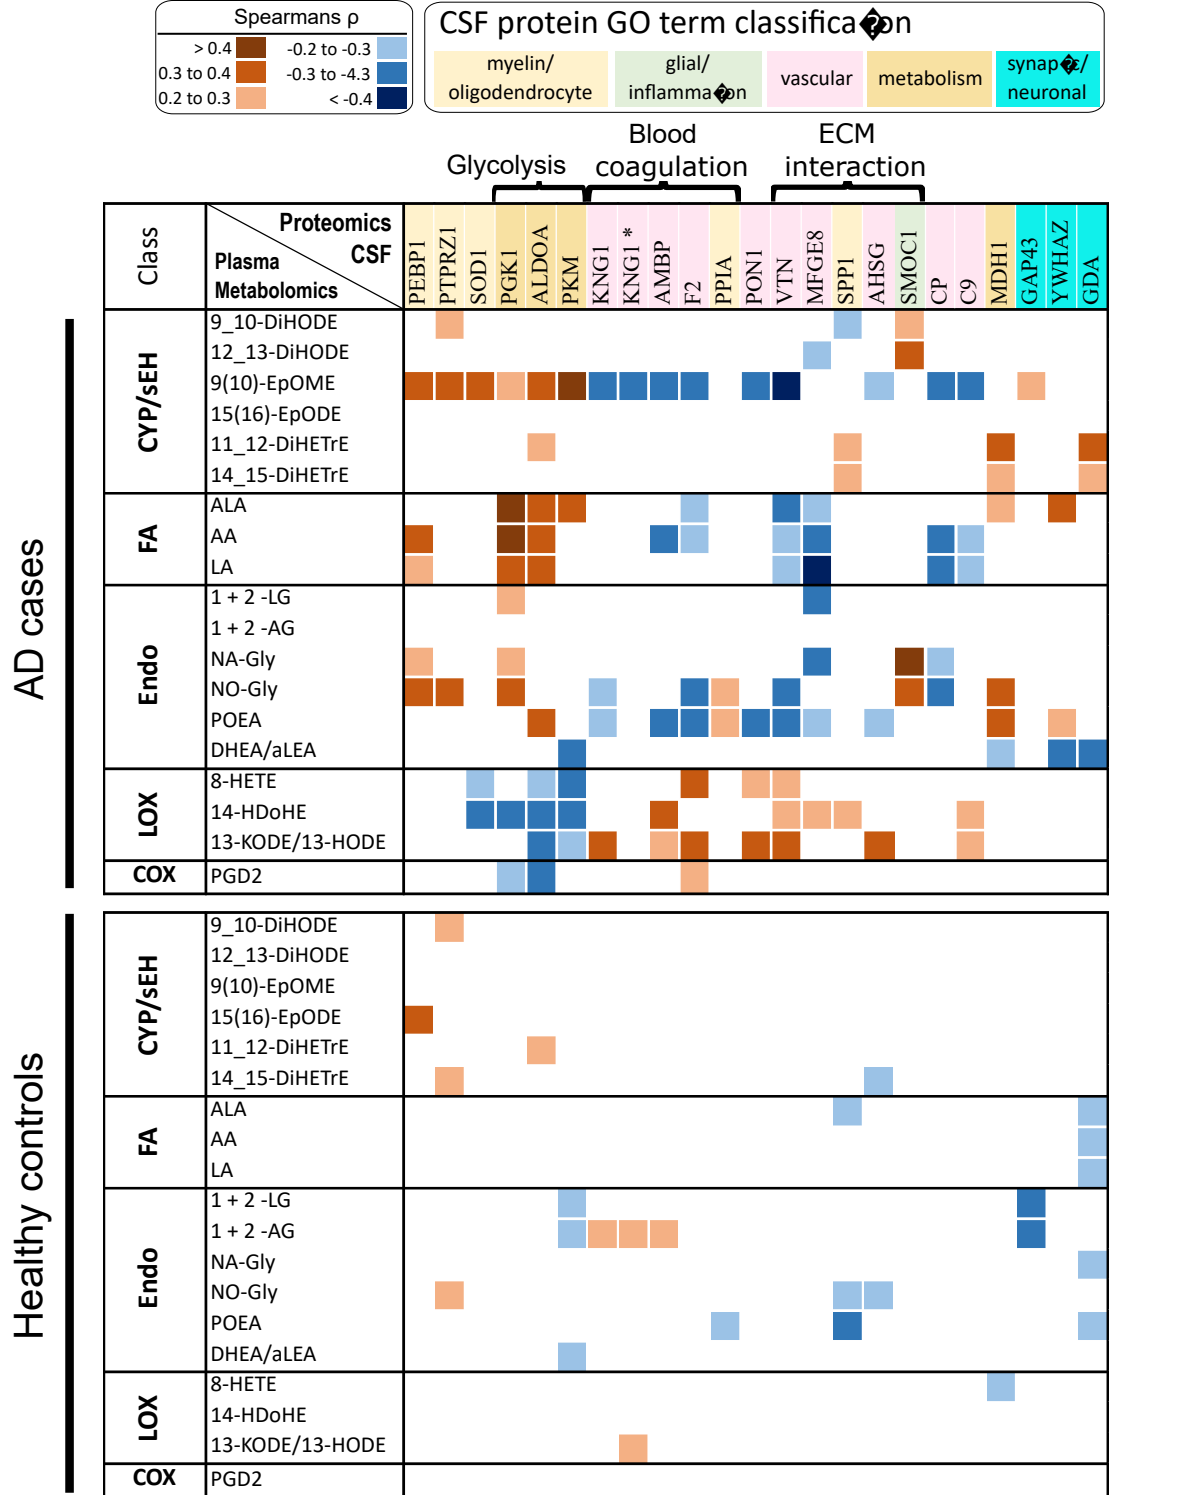

**Figure S4. Spearman's  $\rho$  correlations between AD-implicated CSF proteins and plasma metabolites, including oxylipins, fatty acids and endocannabinoids.** Only significant associations ( $p < 0.05$  and passing FDR corrected at  $q = 0.2$ ) are displayed. Associations are colored according to the Spearman's  $\rho$ , with positive associations on red to orange and negative on blue scale. Proteins are colored according to Gene Ontology (GO) annotations. Additionally, proteins involved in glycolysis, blood coagulation and extracellular matrix (ECM) interaction are indicated. Spearman's  $\rho$  correlations between all analyzed CSF proteins and plasma metabolites are presented in the **Table S6**. N for AD cases = 60; healthy controls = 142. Two splicing variants are reported for KNG1 (P01042 and P01042-2, marked with asterisk).
