# Supplementary material for: Integration of plasma and CSF metabolomics with CSF proteomic reveals novel associations between lipid mediators and central nervous system vascular and energy metabolism
Source: PubMed Central journal article supplement (PMC10447532; doi:10.1038/s41598-023-39737-8), 2023-08-23
Supplement: 41598_2023_39737_MOESM5_ESM.pdf [file 41598_2023_39737_MOESM5_ESM.pdf]

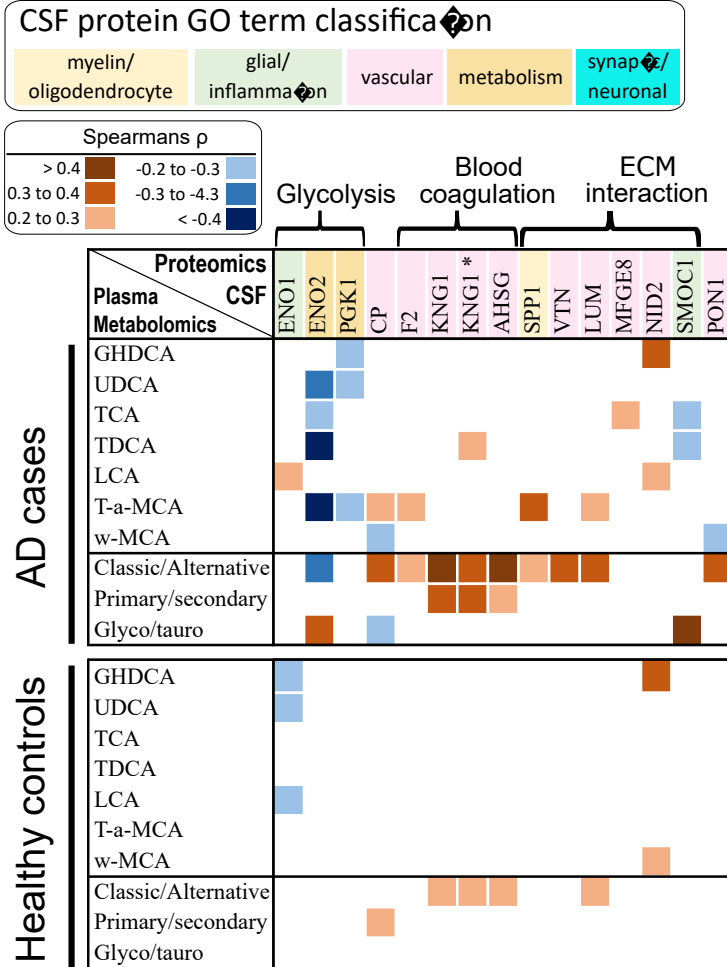

**Figure S5. Spearman's  $\rho$  correlations between AD-implicated CSF proteins and plasma BAs.** Only significant associations ( $p < 0.05$  and passing FDR corrected at  $q = 0.2$ ) are displayed. Proteins are colored according to Gene Ontology (GO) annotations. Additionally, proteins involved in glycolysis, blood coagulation and extracellular matrix (ECM) interaction are indicated. Spearman's  $\rho$  correlations between all analyzed CSF proteins and plasma metabolites are presented in the **Table S6**. N for AD cases = 60; healthy controls = 142. Two splicing variants are reported for KNG1 (P01042 and P01042-2, marked with asterisk). Classic/Alternative pathway is assessed using a ratio of conjugated BAs  $(TCA + GCA + TDCA + GDCA) / (GUDCA + TUDCA + GLCA + TLCA + TCDCA + GCDCA)$ ; Primary/Secondary ratio was assessed using DCA/CA ratio; Glyco/Tauro ratio was assessed using  $(GDCA + GLCA) / (TDCA + TLCA)$ .
